# Supplementary material
Source: Springer Nature journal article supplement (https://www.springermedizin.de/resource/supplementary/12943_2009_697_MOESM3_ESM.pdf/9554602)

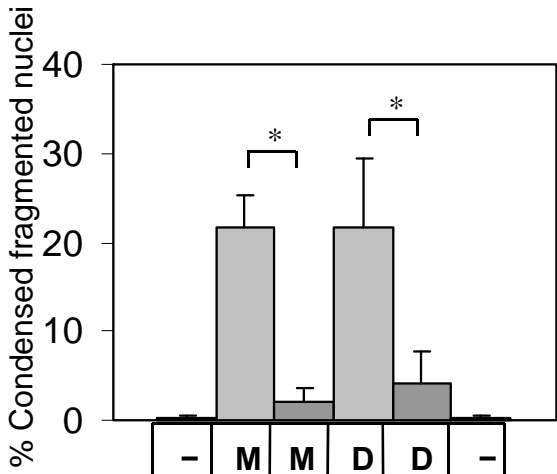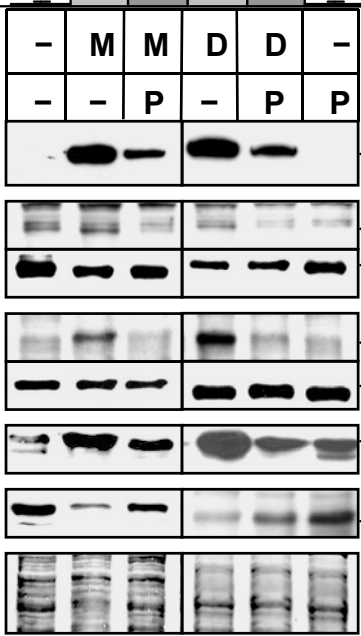

← cleaved PARP

← P-IκBα

← IκBα

← P-p65

← p65

← p53

← XIAP

protein

Supplement: MOESM3 [file 9554602]
